# Supplementary material
Source: PubMed Central journal article supplement (PMC7594375)
Supplement: advancesADV2020002687-suppl1.pdf [file advancesADV2020002687-suppl1.pdf]

## Supplemental Information

Human mutational constraint as a tool to understand biology of rare and emerging bone marrow failure syndromes

Joseph H. Oved<sup>1,2,3</sup>, Daria V. Babushok<sup>2,4</sup>, Michele P. Lambert<sup>1,5</sup>, Nicole Wolfset<sup>6</sup>, M. Anna Kowalska<sup>1</sup>, Mortimer Poncz<sup>1,5</sup>, Konrad J. Karczewski<sup>7,8\*</sup> Timothy S. Olson<sup>2,3,5\*</sup>

<sup>1</sup>Division of Hematology, Department of Pediatrics, Children's Hospital of Philadelphia, Philadelphia, PA; <sup>2</sup>Comprehensive Bone Marrow Failure Center, Division of Hematology, Children's Hospital of Philadelphia, PA; <sup>3</sup>Cell Therapy & Transplant Section, Division of Oncology, Children's Hospital of Philadelphia, PA; <sup>4</sup>Division of Hematology-Oncology, Hospital of University of Pennsylvania, Philadelphia, PA; <sup>5</sup>Department of Pediatrics, Perelman School of Medicine at the University of Pennsylvania, Philadelphia, PA; <sup>6</sup>Department of Pediatrics, A.I. DuPont; <sup>7</sup>Analytic and Translational Genetics Unit, Massachusetts General Hospital, Boston, MA; and <sup>8</sup>Program in Medical and Population Genetics, Broad Institute, Cambridge, MA. \*These authors contributed equally to this study

Correspondence:

Joseph Oved  
3615 Civic Center Blvd  
ARC, Room 302E  
Philadelphia, PA 19104  
ovedj@email.chop.edu  
267-357-1327

## Contents

|                                                                                                                                   |    |
|-----------------------------------------------------------------------------------------------------------------------------------|----|
| Supplemental Table S1: Demographic Data For 125,748 Exomes in gnomAD v2.1.1'                                                      | 3  |
| Supplemental Table S2: Cohorts from which gnomAD exomes and genomes were derived'                                                 | 4  |
| Supplemental Table S3: Observed unique pLoF Variants in 125,748 exomes of gnomAD v2.1.1 compared to 71,702 genomes of gnomAD v3.0 | 6  |
| Supplemental Table S4: Demographic Data For 71,702 Genomes in gnomAD v3.0                                                         | 9  |
| Supplemental Table S5: Frequency of pLOF Variants in IBMF Genes Distributed By Decade of Life                                     | 10 |
| Supplemental Table S6: Frequency Accumulation of pLOF Variants in IBMF Genes By Age                                               | 13 |
| Supplemental Table S7 Loss-of-function Variants in DBA Genes in gnomAD                                                            | 17 |
| Supplemental Table S8: Loss-of-function Variants in <i>SRP54</i> in gnomAD                                                        | 18 |

Supplemental Table S1: Demographic Data For 125,748 Exomes in gnomAD v2.1.1<sup>1,2</sup>

| <b>Sex</b>           |        |
|----------------------|--------|
| Males                | 67,691 |
| Females              | 57,787 |
| <b>Ethnicity</b>     |        |
| African American     | 8,128  |
| Latino               | 17,296 |
| Ashkenazi Jewish     | 5,040  |
| East Asian           | 9,197  |
| Finnish              | 10,824 |
| Non-Finnish European | 56,885 |
| South Asian          | 15,308 |
| Other                | 3,070  |
| <b>Age</b>           |        |
| <30                  | 2,547  |
| 30-39                | 8,069  |
| 40-49                | 18,842 |
| 50-59                | 24,626 |
| 60-69                | 19,416 |
| 70-79                | 10,127 |
| >80                  | 1,935  |

<sup>1</sup> Karczewski KJ, Francioli LC, Tiao G, et al. The mutational constraint spectrum quantified from variation in 141,456 humans. *Nature*. 2020;581(7809):434-443.

<sup>2</sup> <https://gnomad.broadinstitute.org/faq>

## Supplemental Table S2: Cohorts from which gnomAD exomes and genomes were derived<sup>3,4</sup>

1000 Genomes  
1958 Birth Cohort  
African American Coronary Artery Calcification project (AACAC)  
ALSGEN  
Alzheimer's Disease Sequencing Project (ADSP)  
Atrial Fibrillation Genetics Consortium (AFGen)  
    Duke Catheterization Genetics (CATHGEN)  
Bangladesh Risk of Acute Vascular Events (BRAVE) Study  
BioMe Biobank  
Bulgarian Trios  
COPD-Gene  
Estonian Genome Center, University of Tartu (EGCUT)  
Finland-United States Investigation of NIDDM Genetics (FUSION)  
Finnish Migraine Study  
Finnish Twin Cohort Study  
FINN-ADGEN  
FINRISK  
Framingham Heart Study  
Genetics of Cardiometabolic Health in the Amish  
Génome Québec - Genizon Biobank  
Genomic Psychiatry Cohort  
GoT2D  
Genotype-Tissue Expression Project (GTEx)  
Health2000  
Inflammatory Bowel Disease:  
    1000IBD project  
    Helsinki University Hospital Finland  
    NIDDK IBD Genetics Consortium  
    Quebec IBD Genetics Consortium  
Jackson Heart Study  
Jewish Genome Project - funded by Bonei Olam

---

<sup>3</sup> Karczewski KJ, Francioli LC, Tiao G, et al. The mutational constraint spectrum quantified from variation in 141,456 humans. *Nature*. 2020;581(7809):434-443.

<sup>4</sup> <https://gnomad.broadinstitute.org/about>

Kuopio Alzheimer Study  
LifeLines Cohort  
Lung Tissue Research Consortium (LTRC)  
McLean Program for Neuropsychiatric Research, Psychotic Disorders Division  
MESTA  
METabolic Syndrome In Men (METSIM)  
Multi-Ethnic Study of Atherosclerosis (MESA)  
Myocardial Infarction Genetics Consortium (MIGen):  
    Leicester Exome Seq  
    North German MI Study  
    Ottawa Genomics Heart Study  
    Pakistan Risk of Myocardial Infarction Study (PROMIS)  
    Precocious Coronary Artery Disease Study (PROCARDIS)  
    Registre Gironi del COR (REGICOR)  
    South German MI Study  
    Variation in Recovery: Role of Gender on Outcomes of Young AMI Patients (VIRGO)  
National Institute of Mental Health (NIMH) Controls  
NHGRI CCDG  
NHLBI-GO Exome Sequencing Project (ESP)  
NHLBI TOPMed  
Population Architecture Using Genomics and Epidemiology (PAGE) Consortium  
Pritzker Neuropsychiatric Disorders Research Consortium  
Schizophrenia Trios from Taiwan  
Sequencing Initiative Suomi (SiSu)  
SIGMA-T2D  
SubPopulations and InteRmediate Outcome Measures In COPD Study (SPIROMICS)  
Swedish Schizophrenia & Bipolar Studies  
T2D-GENES  
    GoDARTS  
T2D-SEARCH  
The Cancer Genome Atlas (TCGA)  
Whole Genome Sequencing in Psychiatric Disorders (WGSPD)  
Women's Health Initiative (WHI)

Supplemental Table S3: Observed unique pLoF Variants in 125,748 exomes of gnomAD v2.1.1 compared to 71,702 genomes of gnomAD v3.0

| Gene           | OMIM   | Observed Unique pLoF (SNVs) in gnomAD 2.1.1 exomes (n=125,748) | Prevalence of unique pLoF in gnomAD 2.1.1 exomes | Observed Unique pLoF (SNVs) in gnomAD 3.0 (n=71,702) | Prevalence of unique pLoF in gnomAD 3.0 genomes | Observed Unique pLoF (SNVs) in gnomAD 2.1.1 genomes (n=15,708) | Prevalence of unique pLoF in gnomAD 2.1.1 genomes |
|----------------|--------|----------------------------------------------------------------|--------------------------------------------------|------------------------------------------------------|-------------------------------------------------|----------------------------------------------------------------|---------------------------------------------------|
| <i>MDM4</i>    | 602704 | 0                                                              | 0.0                                              | 0                                                    | 0.0                                             |                                                                |                                                   |
| <i>TERT</i>    | 187270 | 7                                                              | 5.6x10 <sup>-5</sup>                             | 6                                                    | 8.4x10 <sup>-5</sup>                            |                                                                |                                                   |
| <i>NAF1</i>    | 617868 | 2                                                              | 1.6x10 <sup>-5</sup>                             | 3                                                    | 4.2x10 <sup>-5</sup>                            |                                                                |                                                   |
| <i>ZCCHC8</i>  | 616381 | 5                                                              | 4.0x10 <sup>-5</sup>                             | 5                                                    | 7.0x10 <sup>-5</sup>                            |                                                                |                                                   |
| <i>POT1</i>    | 606478 | 6                                                              | 4.8x10 <sup>-5</sup>                             | 6                                                    | 8.4x10 <sup>-5</sup>                            |                                                                |                                                   |
| <i>RTEL1</i>   | 608833 | 29                                                             | 2.3x10 <sup>-4</sup>                             | 14                                                   | 2.0x10 <sup>-4</sup>                            |                                                                |                                                   |
| <i>PARN</i>    | 604212 | 14                                                             | 1.1x10 <sup>-4</sup>                             | 10                                                   | 1.4x10 <sup>-4</sup>                            |                                                                |                                                   |
| <i>TINF2</i>   | 604319 | 9                                                              | 7.2x10 <sup>-5</sup>                             | 7                                                    | 9.8x10 <sup>-5</sup>                            |                                                                |                                                   |
| <i>ACD</i>     | 609377 | 21                                                             | 1.7x10 <sup>-4</sup>                             | ***                                                  | ***                                             | 4                                                              | 2.5x10 <sup>-4</sup>                              |
| <i>DKC1</i>    | 300126 | 1                                                              | 8.0x10 <sup>-6</sup>                             | 1                                                    | 1.4x10 <sup>-5</sup>                            |                                                                |                                                   |
| <i>WRAP53</i>  | 612661 | 12                                                             | 9.5x10 <sup>-5</sup>                             | ***                                                  | ***                                             | 2                                                              | 1.3x10 <sup>-4</sup>                              |
| <i>CTC1</i>    | 613129 | 29                                                             | 2.3x10 <sup>-4</sup>                             | ***                                                  | ***                                             | 6                                                              | 3.8x10 <sup>-4</sup>                              |
| <i>STN1</i>    | 613128 | 17                                                             | 1.4x10 <sup>-4</sup>                             | 9                                                    | 1.3x10 <sup>-4</sup>                            |                                                                |                                                   |
| <i>NOP10</i>   | 606471 | 0                                                              | 0.0                                              | 2                                                    | 2.8x10 <sup>-5</sup>                            |                                                                |                                                   |
| <i>NHP2</i>    | 606470 | 3                                                              | 2.4x10 <sup>-5</sup>                             | 3                                                    | 4.2x10 <sup>-5</sup>                            |                                                                |                                                   |
| <i>SRP54</i>   | 604857 | 2                                                              | 1.6x10 <sup>-5</sup>                             | ***                                                  | ***                                             | 0                                                              | 0.0                                               |
| <i>GFI1</i>    | 600871 | 4                                                              | 3.2x10 <sup>-5</sup>                             | ***                                                  | ***                                             | 1                                                              | 6.4x10 <sup>-5</sup>                              |
| <i>WAS</i>     | 300392 | 0                                                              | 0.0                                              | 0                                                    | 0.0                                             |                                                                |                                                   |
| <i>TAZ</i>     | 300394 | 2                                                              | 1.6x10 <sup>-5</sup>                             | 1                                                    | 1.4x10 <sup>-5</sup>                            |                                                                |                                                   |
| <i>WIPF1</i>   | 602357 | 2                                                              | 1.6x10 <sup>-5</sup>                             | 2                                                    | 2.8x10 <sup>-5</sup>                            |                                                                |                                                   |
| <i>LYST</i>    | 606897 | 44                                                             | 3.5x10 <sup>-4</sup>                             | 25                                                   | 3.5x10 <sup>-4</sup>                            |                                                                |                                                   |
| <i>VPS45</i>   | 610035 | 15                                                             | 1.2x10 <sup>-4</sup>                             | ***                                                  | ***                                             | 3                                                              | 1.9x10 <sup>-4</sup>                              |
| <i>VPS13B</i>  | 607817 | 105                                                            | 8.4x10 <sup>-4</sup>                             | 70                                                   | 9.8x10 <sup>-4</sup>                            |                                                                |                                                   |
| <i>DNAJC21</i> | 617048 | 17                                                             | 1.4x10 <sup>-4</sup>                             | ***                                                  | ***                                             | 8                                                              | 5.1x10 <sup>-4</sup>                              |
| <i>CSF3R</i>   | 138971 | 23                                                             | 1.8x10 <sup>-4</sup>                             | ***                                                  | ***                                             | 1                                                              | 6.4x10 <sup>-5</sup>                              |
| <i>USB1</i>    | 613276 | 7                                                              | 5.6x10 <sup>-5</sup>                             | 3                                                    | 4.2x10 <sup>-5</sup>                            |                                                                |                                                   |
| <i>G6PC3</i>   | 611045 | 11                                                             | 8.7x10 <sup>-5</sup>                             | 5                                                    | 7.0x10 <sup>-5</sup>                            |                                                                |                                                   |
| <i>SBDS</i>    | 607444 | 8                                                              | 6.4x10 <sup>-5</sup>                             | 7                                                    | 9.8x10 <sup>-5</sup>                            |                                                                |                                                   |
| <i>HAX1</i>    | 605998 | 12                                                             | 9.5x10 <sup>-5</sup>                             | 3                                                    | 4.2x10 <sup>-5</sup>                            |                                                                |                                                   |
| <i>RAB27A</i>  | 603868 | 10                                                             | 8.0x10 <sup>-5</sup>                             | ***                                                  | ***                                             | 2                                                              | 1.3x10 <sup>-4</sup>                              |
| <i>LAMTOR2</i> | 610389 | 2                                                              | 1.6x10 <sup>-5</sup>                             | 1                                                    | 1.4x10 <sup>-5</sup>                            |                                                                |                                                   |
| <i>KIF23</i>   | 605064 | 4                                                              | 3.2x10 <sup>-5</sup>                             | 3                                                    | 4.2x10 <sup>-5</sup>                            |                                                                |                                                   |
| <i>RPL5</i>    | 603634 | 0                                                              | 0.0                                              | ***                                                  | ***                                             | 0                                                              | 0.0                                               |
| <i>SLC2A1</i>  | 138140 | 1                                                              | 8.0x10 <sup>-6</sup>                             | 0                                                    | 0.0                                             |                                                                |                                                   |
| <i>RPL19</i>   | 180466 | 0                                                              | 0.0                                              | 1                                                    | 1.4x10 <sup>-5</sup>                            |                                                                |                                                   |
| <i>RPL15</i>   | 604174 | 0                                                              | 0.0                                              | ***                                                  | ***                                             | 0                                                              | 0.0                                               |
| <i>RPL18</i>   | 618310 | 0                                                              | 0.0                                              | 1                                                    | 1.4x10 <sup>-5</sup>                            |                                                                |                                                   |
| <i>RPS7</i>    | 603658 | 0                                                              | 0.0                                              | 0                                                    | 0.0                                             |                                                                |                                                   |

|          |        |     |                      |     |                      |   |                      |
|----------|--------|-----|----------------------|-----|----------------------|---|----------------------|
| RPS10    | 603632 | 0   | 0.0                  | *** | ***                  | 0 | 0.0                  |
| RPL11    | 604175 | 0   | 0.0                  | 0   | 0.0                  |   |                      |
| KLF1     | 600599 | 7   | 5.6x10 <sup>-5</sup> | 7   | 9.8x10 <sup>-5</sup> |   |                      |
| RPS19    | 603474 | 0   | 0.0                  | 0   | 0.0                  |   |                      |
| RPL26    | 603704 | 0   | 0.0                  | *** | ***                  | 0 | 0.0                  |
| RPL35A   | 180468 | 0   | 0.0                  | 0   | 0.0                  |   |                      |
| RPL27    | 607526 | 0   | 0.0                  | 0   | 0.0                  |   |                      |
| RPS26    | 603701 | 0   | 0.0                  | 0   | 0.0                  |   |                      |
| RPS27    | 603702 | 0   | 0.0                  | 0   | 0.0                  |   |                      |
| RPL31    | 617415 | 0   | 0.0                  | 0   | 0.0                  |   |                      |
| RPL35    | 618315 | 1   | 8.0x10 <sup>-6</sup> | 1   | 1.4x10 <sup>-5</sup> |   |                      |
| RPS15A   | 603674 | 0   | 0.0                  | 0   | 0.0                  |   |                      |
| RPS24    | 602412 | 1   | 8.0x10 <sup>-6</sup> | *** | ***                  | 0 | 0.0                  |
| RPS29    | 603633 | 1   | 8.0x10 <sup>-6</sup> | *** | ***                  | 0 | 0.0                  |
| RPS28    | 603685 | 0   | 0.0                  | 0   | 0.0                  |   |                      |
| RPS17    | 180472 | *   | *                    | *   | *                    | * | *                    |
| ALAS2    | 301300 | 0   | 0.0                  | 0   | 0.0                  |   |                      |
| TSR2     | 300945 | 0   | 0.0                  | 0   | 0.0                  |   |                      |
| CDAN1    | 607465 | 30  | 2.4x10 <sup>-4</sup> | 24  | 3.5x10 <sup>-4</sup> |   |                      |
| SEC23B   | 610512 | 37  | 2.9x10 <sup>-4</sup> | *** | ***                  | 8 | 5.1x10 <sup>-4</sup> |
| CECR1    | 607575 | 14  | 1.1x10 <sup>-4</sup> | *** | ***                  | 3 | 1.9x10 <sup>-4</sup> |
| SLC25A38 | 610819 | 10  | 8.0x10 <sup>-5</sup> | *** | ***                  | 3 | 1.9x10 <sup>-4</sup> |
| GLRX5    | 609588 | 0   | 0.0                  | 2   | 2.8x10 <sup>-5</sup> |   |                      |
| FANCB    | 300515 | 1   | 8.0x10 <sup>-6</sup> | 0   | 0.0                  |   |                      |
| RAD51    | 179617 | 6   | 4.8x10 <sup>-5</sup> | *** | ***                  | 1 | 6.4x10 <sup>-5</sup> |
| NHEJ1    | 611290 | 7   | 5.6x10 <sup>-5</sup> | 3   | 4.2x10 <sup>-5</sup> |   |                      |
| FANCM    | 609644 | 40  | 3.2x10 <sup>-4</sup> | 23  | 3.2x10 <sup>-4</sup> |   |                      |
| BRCA2    | 600185 | 61  | 4.9x10 <sup>-4</sup> | 45  | 6.3x10 <sup>-4</sup> |   |                      |
| ATM      | 607585 | 103 | 8.2x10 <sup>-4</sup> | 72  | 1.0x10 <sup>-3</sup> |   |                      |
| ERCC6L2  | 615667 | 17  | 1.4x10 <sup>-4</sup> | *** | ***                  | 8 | 5.1x10 <sup>-4</sup> |
| FANCD2   | 613984 | 60  | 4.8x10 <sup>-4</sup> | 30  | 4.2x10 <sup>-4</sup> |   |                      |
| FANCE    | 613976 | 13  | 1.0x10 <sup>-4</sup> | 11  | 1.5x10 <sup>-4</sup> |   |                      |
| SLX4     | 613278 | 45  | 3.6x10 <sup>-4</sup> | 20  | 2.8x10 <sup>-4</sup> |   |                      |
| LIG4     | 601837 | 13  | 1.0x10 <sup>-4</sup> | 3   | 4.2x10 <sup>-5</sup> |   |                      |
| ESCO2    | 609353 | 15  | 1.2x10 <sup>-4</sup> | 6   | 8.4x10 <sup>-5</sup> |   |                      |
| ERCC4    | 133520 | 25  | 2.0x10 <sup>-4</sup> | 17  | 2.4x10 <sup>-4</sup> |   |                      |
| FANCC    | 613899 | 24  | 1.9x10 <sup>-4</sup> | 22  | 3.1x10 <sup>-4</sup> |   |                      |
| FANCI    | 611360 | 63  | 5.0x10 <sup>-4</sup> | 32  | 4.5x10 <sup>-4</sup> |   |                      |
| NBN      | 602667 | 30  | 2.4x10 <sup>-4</sup> | 16  | 2.2x10 <sup>-4</sup> |   |                      |
| DDX11    | 601150 | 40  | 3.2x10 <sup>-4</sup> | *** | ***                  | 8 | 5.1x10 <sup>-4</sup> |
| PALB2    | 610355 | 35  | 2.8x10 <sup>-4</sup> | 20  | 2.8x10 <sup>-4</sup> |   |                      |
| BRCA1    | 113705 | 55  | 4.4x10 <sup>-4</sup> | *** | ***                  | 9 | 5.7x10 <sup>-4</sup> |
| FANCG    | 602956 | 25  | 2.0x10 <sup>-4</sup> | 19  | 2.6x10 <sup>-4</sup> |   |                      |
| FANCA    | 607139 | 96  | 7.6x10 <sup>-4</sup> | 47  | 6.6x10 <sup>-4</sup> |   |                      |
| RAD51C   | 602774 | 20  | 1.6x10 <sup>-4</sup> | 13  | 1.8x10 <sup>-4</sup> |   |                      |
| FANCL    | 608111 | 31  | 2.5x10 <sup>-4</sup> | *** | ***                  | 3 | 1.9x10 <sup>-4</sup> |
| FANCF    | 613897 | 0   | 0.0                  | 0   | 0.0                  |   |                      |
| MECOM    | 165215 | 5   | 4.0x10 <sup>-5</sup> | *** | ***                  | 0 | 0.0                  |

|               |        |    |                      |     |                      |   |                      |
|---------------|--------|----|----------------------|-----|----------------------|---|----------------------|
| <i>PAX5</i>   | 167414 | 0  | 0.0                  | 0   | 0.0                  |   |                      |
| <i>ETV6</i>   | 600618 | 3  | 2.4x10 <sup>-5</sup> | 3   | 4.2x10 <sup>-5</sup> |   |                      |
| <i>GATA2</i>  | 137295 | 1  | 8.0x10 <sup>-6</sup> | 0   | 0.0                  |   |                      |
| <i>FLI1</i>   | 193067 | 2  | 1.6x10 <sup>-5</sup> | 1   | 1.4x10 <sup>-5</sup> |   |                      |
| <i>SRP72</i>  | 602122 | 13 | 1.0x10 <sup>-4</sup> | *** | ***                  | 1 | 6.4x10 <sup>-5</sup> |
| <i>RUNX1</i>  | 151385 | 0  | 0.0                  | 3   | 4.2x10 <sup>-5</sup> |   |                      |
| <i>CBL</i>    | 165360 | 14 | 1.1x10 <sup>-4</sup> | 9   | 1.3x10 <sup>-4</sup> |   |                      |
| <i>DDX41</i>  | 608170 | 18 | 1.4x10 <sup>-4</sup> | *** | ***                  | 4 | 2.5x10 <sup>-4</sup> |
| <i>GFI1B</i>  | 604383 | 10 | 8.0x10 <sup>-5</sup> | 5   | 7.0x10 <sup>-5</sup> |   |                      |
| <i>SAMD9L</i> | 611170 | 32 | 2.5x10 <sup>-4</sup> | 20  | 2.8x10 <sup>-4</sup> |   |                      |
| <i>SAMD9</i>  | 610456 | 51 | 4.1x10 <sup>-4</sup> | 38  | 5.3x10 <sup>-4</sup> |   |                      |
| <i>HOXA11</i> | 142958 | 0  | 0.0                  | 1   | 1.4x10 <sup>-5</sup> |   |                      |
| <i>CEBPA</i>  | 116897 | 0  | 0.0                  | 1   | 1.4x10 <sup>-5</sup> |   |                      |
| <i>GATA1</i>  | 305371 | 0  | 0.0                  | 0   | 0.0                  |   |                      |
| <i>AK2</i>    | 103020 | 8  | 6.4x10 <sup>-5</sup> | *** | ***                  | 1 | 6.4x10 <sup>-5</sup> |

\*\*\* For validation, we used two independent genome datasets of 71,702 sequenced genomes included in gnomAD v3.0 and 15,708 genomes included in gnomAD v.2.1.1. Using gnomAD v3.0 we were able to determine the number of high-confidence pLoF variants in 73/100 genes. The 27 genes that could not be accurately analyzed in gnomAD3.0 due to differences in the genome builds and canonical transcript mapping, were analyzed using another cohort of 15,708 genomes included in gnomAD v.2.1.1. These genomes are in addition to the 125,748 exomes in gnomAD v2.1.1 that we analyzed in our manuscript and are included as a subset of the 71,702 genomes in v3.0. Notably, there are certain important limitations in making direct comparisons between v2.1.1. and v3.0 stemming from different genome builds (GRCh37/hg19 built with Gencode v19 and VEP v85 for v2.1.1 compared to GRCh38 built using Gencode v29 and VEP v95 for v3.0), and comparing exome to genome data. Rather, we present this as a survey to show that there are no significant enrichments or depletions of unique SNV pLoF variants in the gnomAD v2.1.1 exome cohort.



Supplemental Table S4: Demographic Data For 71,702 Genomes in gnomAD v3.0<sup>5</sup>

| <b>Sex</b>           |        |
|----------------------|--------|
| Males                | 34,752 |
| Females              | 36,950 |
| <b>Ethnicity</b>     |        |
| African American     | 21,042 |
| Amish                | 450    |
| Latino               | 6,835  |
| Ashkenazi Jewish     | 1,662  |
| East Asian           | 1,567  |
| Finnish              | 5,244  |
| Non-Finnish European | 32,399 |
| South Asian          | 1,526  |
| Other                | 1,077  |

<sup>5</sup> <https://gnomad.broadinstitute.org/faq>

Supplemental Table S5: Frequency of pLOF Variants in IBMF Genes Distributed By Decade of Life

| Frequency of pLOF Variants Distributed By Age<br>(n=85462) |                            |                             |                              |                              |                              |                              |                            |
|------------------------------------------------------------|----------------------------|-----------------------------|------------------------------|------------------------------|------------------------------|------------------------------|----------------------------|
| Gene                                                       | Frequency <30<br>(n=2,547) | Frequency 30-39<br>(n=8069) | Frequency 40-49<br>(n=18842) | Frequency 50-59<br>(n=24626) | Frequency 60-69<br>(n=19416) | Frequency 70-79<br>(n=10127) | Frequency >80<br>(n=1,935) |
| <i>MDM4</i>                                                | 0.000                      | 0.000                       | 0.000                        | 0.000                        | 0.000                        | 0.000                        | 0.000                      |
| <i>TERT</i>                                                | 3.93x10 <sup>-4</sup>      | 3.72x10 <sup>-4</sup>       | 2.12x10 <sup>-4</sup>        | 1.62x10 <sup>-4</sup>        | 2.58x10 <sup>-4</sup>        | 1.97x10 <sup>-4</sup>        | 0.000                      |
| <i>NAF1</i>                                                | 0.000                      | 0.000                       | 5.31x10 <sup>-5</sup>        | 4.06x10 <sup>-5</sup>        | 1.03x10 <sup>-4</sup>        | 1.97x10 <sup>-4</sup>        | 0.000                      |
| <i>ZCCHC8</i>                                              | 3.93x10 <sup>-4</sup>      | 1.24x10 <sup>-4</sup>       | 5.31x10 <sup>-5</sup>        | 0.000                        | 1.03x10 <sup>-4</sup>        | 0.000                        | 0.000                      |
| <i>POT1</i>                                                | 3.93x10 <sup>-4</sup>      | 4.96x10 <sup>-4</sup>       | 3.72x10 <sup>-4</sup>        | 1.22x10 <sup>-4</sup>        | 2.58x10 <sup>-4</sup>        | 9.87x10 <sup>-5</sup>        | 5.17x10 <sup>-4</sup>      |
| <i>RTEL1</i>                                               | 3.93x10 <sup>-4</sup>      | 6.20x10 <sup>-4</sup>       | 5.84x10 <sup>-4</sup>        | 8.53x10 <sup>-4</sup>        | 4.64x10 <sup>-4</sup>        | 6.91x10 <sup>-4</sup>        | 1.03x10 <sup>-3</sup>      |
| <i>PARN</i>                                                | 0.000                      | 9.9x10 <sup>-4</sup>        | 1.06x10 <sup>-4</sup>        | 2.03x10 <sup>-4</sup>        | 1.03x10 <sup>-4</sup>        | 9.87x10 <sup>-5</sup>        | 0.000                      |
| <i>TINF2</i>                                               | 3.93x10 <sup>-4</sup>      | 1.24x10 <sup>-4</sup>       | 1.06x10 <sup>-4</sup>        | 1.22x10 <sup>-4</sup>        | 0.000                        | 1.97x10 <sup>-4</sup>        | 0.000                      |
| <i>ACD</i>                                                 | 0.000                      | 7.44x10 <sup>-4</sup>       | 2.65x10 <sup>-4</sup>        | 2.03x10 <sup>-4</sup>        | 3.09x10 <sup>-4</sup>        | 4.94x10 <sup>-4</sup>        | 1.03x10 <sup>-3</sup>      |
| <i>DKC1</i>                                                | 0.000                      | 0.000                       | 0.000                        | 0.000                        | 0.000                        | 0.000                        | 0.000                      |
| <i>NOP10</i>                                               | 0.000                      | 0.000                       | 0.000                        | 4.06x10 <sup>-5</sup>        | 0.000                        | 0.000                        | 5.17x10 <sup>-4</sup>      |
| <i>WRAP53</i>                                              | 0.000                      | 6.20x10 <sup>-4</sup>       | 6.37x10 <sup>-4</sup>        | 2.84x10 <sup>-4</sup>        | 1.55x10 <sup>-4</sup>        | 3.95x10 <sup>-4</sup>        | 5.17x10 <sup>-4</sup>      |
| <i>CTC1</i>                                                | 4.31x10 <sup>-3</sup>      | 2.23x10 <sup>-3</sup>       | 2.97x10 <sup>-3</sup>        | 2.84x10 <sup>-3</sup>        | 2.99x10 <sup>-3</sup>        | 2.76x10 <sup>-3</sup>        | 1.55x10 <sup>-3</sup>      |
| <i>STN1</i>                                                | 0.000                      | 3.72x10 <sup>-4</sup>       | 4.25x10 <sup>-4</sup>        | 4.06x10 <sup>-4</sup>        | 3.09x10 <sup>-4</sup>        | 2.96x10 <sup>-4</sup>        | 5.17x10 <sup>-4</sup>      |
| <i>NHP2</i>                                                | 0.000                      | 2.48x10 <sup>-4</sup>       | 3.18x10 <sup>-4</sup>        | 4.06x10 <sup>-4</sup>        | 4.12x10 <sup>-4</sup>        | 4.94x10 <sup>-4</sup>        | 1.03x10 <sup>-3</sup>      |
| <i>SRP54</i>                                               | 3.93x10 <sup>-4</sup>      | 0.000                       | 5.31x10 <sup>-5</sup>        | 8.12x10 <sup>-5</sup>        | 0.000                        | 0.000                        | 0.000                      |
| <i>GFI1</i>                                                | 0.000                      | 0.000                       | 1.59x10 <sup>-4</sup>        | 4.06x10 <sup>-5</sup>        | 2.06x10 <sup>-4</sup>        | 0.000                        | 0.000                      |
| <i>WAS</i>                                                 | 0.000                      | 0.000                       | 0.000                        | 0.000                        | 0.000                        | 0.000                        | 0.000                      |
| <i>TAZ</i>                                                 | 0.000                      | 0.000                       | 0.000                        | 0.000                        | 0.000                        | 0.000                        | 0.000                      |
| <i>WIPF1</i>                                               | 0.000                      | 1.24x10 <sup>-4</sup>       | 0.000                        | 8.12x10 <sup>-5</sup>        | 0.000                        | 0.000                        | 0.000                      |
| <i>LYST</i>                                                | 1.18x10 <sup>-3</sup>      | 6.20x10 <sup>-4</sup>       | 6.90x10 <sup>-4</sup>        | 7.72x10 <sup>-4</sup>        | 6.18x10 <sup>-4</sup>        | 2.96x10 <sup>-4</sup>        | 5.17x10 <sup>-4</sup>      |
| <i>VPS45</i>                                               | 7.85x10 <sup>-4</sup>      | 2.48x10 <sup>-4</sup>       | 4.25x10 <sup>-4</sup>        | 3.65x10 <sup>-4</sup>        | 5.67x10 <sup>-4</sup>        | 3.95x10 <sup>-4</sup>        | 0.000                      |
| <i>VPS13B</i>                                              | 2.36x10 <sup>-3</sup>      | 2.60x10 <sup>-3</sup>       | 3.45x10 <sup>-3</sup>        | 3.17x10 <sup>-3</sup>        | 3.86x10 <sup>-3</sup>        | 3.16x10 <sup>-3</sup>        | 1.03x10 <sup>-3</sup>      |
| <i>DNAJC21</i>                                             | 1.57x10 <sup>-3</sup>      | 2.11x10 <sup>-3</sup>       | 1.33x10 <sup>-3</sup>        | 1.02x10 <sup>-3</sup>        | 1.39x10 <sup>-3</sup>        | 1.48x10 <sup>-3</sup>        | 1.03x10 <sup>-3</sup>      |
| <i>CSF3R</i>                                               | 7.85x10 <sup>-4</sup>      | 6.20x10 <sup>-4</sup>       | 1.01x10 <sup>-3</sup>        | 8.12x10 <sup>-4</sup>        | 7.73x10 <sup>-4</sup>        | 8.89x10 <sup>-4</sup>        | 1.03x10 <sup>-3</sup>      |
| <i>LAMTOR2</i>                                             | 0.000                      | 0.000                       | 5.31x10 <sup>-5</sup>        | 0.000                        | 5.15x10 <sup>-5</sup>        | 9.87x10 <sup>-5</sup>        | 0.000                      |
| <i>USB1</i>                                                | 0.000                      | 7.44x10 <sup>-4</sup>       | 5.31x10 <sup>-5</sup>        | 2.84x10 <sup>-4</sup>        | 2.57x10 <sup>-4</sup>        | 1.97x10 <sup>-4</sup>        | 5.17x10 <sup>-4</sup>      |
| <i>G6PC3</i>                                               | 7.85x10 <sup>-4</sup>      | 2.48x10 <sup>-4</sup>       | 8.49x10 <sup>-4</sup>        | 5.28x10 <sup>-4</sup>        | 5.67x10 <sup>-4</sup>        | 6.91x10 <sup>-4</sup>        | 5.17x10 <sup>-4</sup>      |
| <i>SBDS</i>                                                | 7.07x10 <sup>-3</sup>      | 8.43x10 <sup>-3</sup>       | 7.96x10 <sup>-3</sup>        | 8.41x10 <sup>-3</sup>        | 8.45x10 <sup>-3</sup>        | 7.90x10 <sup>-3</sup>        | 6.72x10 <sup>-3</sup>      |
| <i>HAX1</i>                                                | 1.57x10 <sup>-3</sup>      | 8.68x10 <sup>-4</sup>       | 6.37x10 <sup>-4</sup>        | 6.09x10 <sup>-4</sup>        | 1.24x10 <sup>-3</sup>        | 1.88x10 <sup>-3</sup>        | 5.17x10 <sup>-4</sup>      |
| <i>RAB27A</i>                                              | 0.000                      | 6.20x10 <sup>-4</sup>       | 6.37x10 <sup>-4</sup>        | 3.65x10 <sup>-4</sup>        | 3.09x10 <sup>-4</sup>        | 5.92x10 <sup>-4</sup>        | 1.03x10 <sup>-3</sup>      |
| <i>KIF23</i>                                               | 0.000                      | 1.24x10 <sup>-4</sup>       | 5.31x10 <sup>-5</sup>        | 0.000                        | 5.15x10 <sup>-5</sup>        | 1.97x10 <sup>-4</sup>        | 0.000                      |
| <i>RPL5</i>                                                | 0.000                      | 0.000                       | 0.000                        | 0.000                        | 0.000                        | 0.000                        | 0.000                      |
| <i>SLC2A1</i>                                              | 0.000                      | 0.000                       | 0.000                        | 4.06x10 <sup>-5</sup>        | 0.000                        | 0.000                        | 0.000                      |
| <i>RPL19</i>                                               | 0.000                      | 0.000                       | 0.000                        | 0.000                        | 0.000                        | 0.000                        | 0.000                      |
| <i>RPL15</i>                                               | 0.000                      | 0.000                       | 0.000                        | 0.000                        | 0.000                        | 0.000                        | 0.000                      |
| <i>RPL18</i>                                               | 0.000                      | 0.000                       | 0.000                        | 0.000                        | 0.000                        | 0.000                        | 0.000                      |

|          |                       |                       |                       |                       |                       |                       |                       |                       |
|----------|-----------------------|-----------------------|-----------------------|-----------------------|-----------------------|-----------------------|-----------------------|-----------------------|
| RPS7     | 0.000                 | 0.000                 | 0.000                 | 0.000                 | 0.000                 | 0.000                 | 0.000                 | 0.000                 |
| RPS10    | 0.000                 | 0.000                 | 0.000                 | 0.000                 | 0.000                 | 0.000                 | 0.000                 | 0.000                 |
| RPL11    | 0.000                 | 0.000                 | 0.000                 | 0.000                 | 0.000                 | 0.000                 | 0.000                 | 0.000                 |
| RPS19    | 0.000                 | 0.000                 | 0.000                 | 0.000                 | 0.000                 | 0.000                 | 0.000                 | 0.000                 |
| RPL26    | 0.000                 | 0.000                 | 0.000                 | 0.000                 | 0.000                 | 5.15x10 <sup>-5</sup> | 0.000                 | 0.000                 |
| RPL35A   | 0.000                 | 0.000                 | 0.000                 | 0.000                 | 0.000                 | 0.000                 | 0.000                 | 0.000                 |
| RPL27    | 0.000                 | 0.000                 | 0.000                 | 0.000                 | 4.06x10 <sup>-5</sup> | 0.000                 | 0.000                 | 0.000                 |
| RPS26    | 0.000                 | 0.000                 | 0.000                 | 0.000                 | 0.000                 | 0.000                 | 0.000                 | 0.000                 |
| RPS27    | 0.000                 | 0.000                 | 0.000                 | 0.000                 | 0.000                 | 0.000                 | 0.000                 | 0.000                 |
| RPL31    | 0.000                 | 0.000                 | 0.000                 | 0.000                 | 0.000                 | 0.000                 | 9.87x10 <sup>-5</sup> | 0.000                 |
| RPL35    | 0.000                 | 0.000                 | 0.000                 | 0.000                 | 0.000                 | 0.000                 | 9.87x10 <sup>-5</sup> | 0.000                 |
| RPS15A   | 0.000                 | 0.000                 | 0.000                 | 0.000                 | 0.000                 | 0.000                 | 0.000                 | 0.000                 |
| RPS24    | 0.000                 | 0.000                 | 0.000                 | 0.000                 | 0.000                 | 5.15x10 <sup>-5</sup> | 0.000                 | 0.000                 |
| RPS29    | 0.000                 | 0.000                 | 0.000                 | 0.000                 | 0.000                 | 0.000                 | 0.000                 | 0.000                 |
| RPS28    | 0.000                 | 0.000                 | 0.000                 | 0.000                 | 0.000                 | 0.000                 | 0.000                 | 0.000                 |
| KLF1     | 0.000                 | 1.24x10 <sup>-4</sup> | 2.65x10 <sup>-4</sup> | 2.03x10 <sup>-4</sup> | 5.15x10 <sup>-5</sup> | 1.97x10 <sup>-4</sup> | 0.000                 | 0.000                 |
| RPS17    | 0.000                 | 0.000                 | 0.000                 | 0.000                 | 0.000                 | 0.000                 | 0.000                 | 0.000                 |
| ALAS2    | 0.000                 | 0.000                 | 0.000                 | 0.000                 | 0.000                 | 0.000                 | 0.000                 | 0.000                 |
| TSR2     | 0.000                 | 0.000                 | 0.000                 | 0.000                 | 0.000                 | 0.000                 | 0.000                 | 0.000                 |
| GLRX5    | 0.000                 | 0.000                 | 0.000                 | 0.000                 | 0.000                 | 0.000                 | 0.000                 | 0.000                 |
| CDAN1    | 1.18x10 <sup>-3</sup> | 4.96x10 <sup>-4</sup> | 9.02x10 <sup>-4</sup> | 1.02x10 <sup>-3</sup> | 3.61x10 <sup>-4</sup> | 1.18x10 <sup>-3</sup> | 5.17x10 <sup>-4</sup> | 5.17x10 <sup>-4</sup> |
| SEC23B   | 1.18x10 <sup>-3</sup> | 1.49x10 <sup>-3</sup> | 1.43x10 <sup>-3</sup> | 1.42x10 <sup>-3</sup> | 1.75x10 <sup>-3</sup> | 8.89x10 <sup>-4</sup> | 2.07x10 <sup>-3</sup> | 2.07x10 <sup>-3</sup> |
| CECR1    | 7.85x10 <sup>-4</sup> | 8.68x10 <sup>-4</sup> | 5.84x10 <sup>-4</sup> | 4.06x10 <sup>-4</sup> | 8.24x10 <sup>-4</sup> | 8.89x10 <sup>-4</sup> | 5.17x10 <sup>-4</sup> | 5.17x10 <sup>-4</sup> |
| SLC25A38 | 0.000                 | 7.44x10 <sup>-4</sup> | 4.78x10 <sup>-4</sup> | 6.90x10 <sup>-4</sup> | 6.18x10 <sup>-4</sup> | 1.09x10 <sup>-3</sup> | 0.000                 | 0.000                 |

|         |                       |                       |                       |                       |                       |                       |                       |                       |
|---------|-----------------------|-----------------------|-----------------------|-----------------------|-----------------------|-----------------------|-----------------------|-----------------------|
| RAD51   | 3.93x10 <sup>-4</sup> | 0.000                 | 1.06x10 <sup>-4</sup> | 0.000                 | 5.15x10 <sup>-5</sup> | 0.000                 | 0.000                 | 0.000                 |
| FANCB   | 0.000                 | 0.000                 | 0.000                 | 0.000                 | 0.000                 | 0.000                 | 0.000                 | 0.000                 |
| NHEJ1   | 0.000                 | 3.72x10 <sup>-4</sup> | 1.06x10 <sup>-4</sup> | 4.06x10 <sup>-5</sup> | 0.000                 | 0.000                 | 0.000                 | 0.000                 |
| FANCM   | 4.32x10 <sup>-3</sup> | 2.72x10 <sup>-3</sup> | 2.87x10 <sup>-3</sup> | 3.65x10 <sup>-3</sup> | 2.99x10 <sup>-3</sup> | 3.16x10 <sup>-3</sup> | 2.58x10 <sup>-3</sup> | 2.58x10 <sup>-3</sup> |
| BRCA2   | 7.85x10 <sup>-4</sup> | 7.44x10 <sup>-4</sup> | 8.49x10 <sup>-4</sup> | 8.12x10 <sup>-4</sup> | 4.12x10 <sup>-4</sup> | 8.89x10 <sup>-4</sup> | 0.000                 | 0.000                 |
| ATM     | 3.14x10 <sup>-3</sup> | 2.85x10 <sup>-3</sup> | 2.60x10 <sup>-3</sup> | 2.55x10 <sup>-3</sup> | 2.88x10 <sup>-3</sup> | 2.07x10 <sup>-3</sup> | 2.58x10 <sup>-3</sup> | 2.58x10 <sup>-3</sup> |
| ERCC6L2 | 3.93x10 <sup>-3</sup> | 2.11x10 <sup>-3</sup> | 1.22x10 <sup>-3</sup> | 1.14x10 <sup>-3</sup> | 1.08x10 <sup>-3</sup> | 1.08x10 <sup>-3</sup> | 5.17x10 <sup>-4</sup> | 5.17x10 <sup>-4</sup> |
| FANCD2  | 1.18x10 <sup>-3</sup> | 1.24x10 <sup>-3</sup> | 1.59x10 <sup>-3</sup> | 1.30x10 <sup>-3</sup> | 1.44x10 <sup>-3</sup> | 1.88x10 <sup>-3</sup> | 1.03x10 <sup>-3</sup> | 1.03x10 <sup>-3</sup> |
| FANCE   | 1.18x10 <sup>-3</sup> | 8.68x10 <sup>-4</sup> | 4.78x10 <sup>-4</sup> | 5.28x10 <sup>-4</sup> | 5.67x10 <sup>-4</sup> | 1.97x10 <sup>-4</sup> | 0.000                 | 0.000                 |
| SLX4    | 3.93x10 <sup>-4</sup> | 1.24x10 <sup>-3</sup> | 1.49x10 <sup>-3</sup> | 1.42x10 <sup>-3</sup> | 1.60x10 <sup>-3</sup> | 7.90x10 <sup>-4</sup> | 1.03x10 <sup>-3</sup> | 1.03x10 <sup>-3</sup> |
| LIG4    | 2.36x10 <sup>-3</sup> | 1.36x10 <sup>-3</sup> | 1.06x10 <sup>-3</sup> | 1.38x10 <sup>-3</sup> | 1.24x10 <sup>-3</sup> | 2.07x10 <sup>-3</sup> | 1.03x10 <sup>-3</sup> | 1.03x10 <sup>-3</sup> |
| ESCO2   | 0.000                 | 0.000                 | 3.18x10 <sup>-4</sup> | 1.22x10 <sup>-4</sup> | 1.55x10 <sup>-4</sup> | 0.000                 | 0.000                 | 0.000                 |
| ERCC4   | 3.93x10 <sup>-4</sup> | 9.91x10 <sup>-4</sup> | 9.55x10 <sup>-4</sup> | 6.90x10 <sup>-4</sup> | 6.18x10 <sup>-4</sup> | 1.38x10 <sup>-3</sup> | 1.55x10 <sup>-3</sup> | 1.55x10 <sup>-3</sup> |
| FANCC   | 7.85x10 <sup>-4</sup> | 1.61x10 <sup>-3</sup> | 9.02x10 <sup>-4</sup> | 6.50x10 <sup>-4</sup> | 5.67x10 <sup>-4</sup> | 5.92x10 <sup>-4</sup> | 1.03x10 <sup>-3</sup> | 1.03x10 <sup>-3</sup> |
| FANCI   | 1.57x10 <sup>-3</sup> | 2.97x10 <sup>-3</sup> | 2.02x10 <sup>-3</sup> | 1.75x10 <sup>-3</sup> | 1.96x10 <sup>-3</sup> | 2.57x10 <sup>-3</sup> | 5.17x10 <sup>-4</sup> | 5.17x10 <sup>-4</sup> |
| NBN     | 1.18x10 <sup>-3</sup> | 9.91x10 <sup>-4</sup> | 7.43x10 <sup>-4</sup> | 8.53x10 <sup>-4</sup> | 8.24x10 <sup>-4</sup> | 6.91x10 <sup>-4</sup> | 5.17x10 <sup>-4</sup> | 5.17x10 <sup>-4</sup> |
| DDX11   | 5.1x10 <sup>-3</sup>  | 1.24x10 <sup>-3</sup> | 1.38x10 <sup>-3</sup> | 1.54x10 <sup>-3</sup> | 1.96x10 <sup>-3</sup> | 1.88x10 <sup>-3</sup> | 3.62x10 <sup>-3</sup> | 3.62x10 <sup>-3</sup> |
| PALB2   | 0.000                 | 2.48x10 <sup>-4</sup> | 3.72x10 <sup>-4</sup> | 2.84x10 <sup>-4</sup> | 3.61x10 <sup>-4</sup> | 3.95x10 <sup>-4</sup> | 0.000                 | 0.000                 |
| BRCA1   | 7.85x10 <sup>-4</sup> | 9.91x10 <sup>-4</sup> | 1.27x10 <sup>-3</sup> | 6.90x10 <sup>-4</sup> | 1.03x10 <sup>-3</sup> | 1.09x10 <sup>-3</sup> | 2.07x10 <sup>-3</sup> | 2.07x10 <sup>-3</sup> |
| FANCG   | 1.57x10 <sup>-3</sup> | 9.91x10 <sup>-4</sup> | 9.55x10 <sup>-4</sup> | 8.12x10 <sup>-4</sup> | 8.76x10 <sup>-4</sup> | 3.95x10 <sup>-4</sup> | 1.03x10 <sup>-3</sup> | 1.03x10 <sup>-3</sup> |
| FANCA   | 1.18x10 <sup>-3</sup> | 2.35x10 <sup>-3</sup> | 2.97x10 <sup>-3</sup> | 2.23x10 <sup>-3</sup> | 1.75x10 <sup>-3</sup> | 3.16x10 <sup>-3</sup> | 3.10x10 <sup>-3</sup> | 3.10x10 <sup>-3</sup> |
| RAD51C  | 1.57x10 <sup>-3</sup> | 7.44x10 <sup>-4</sup> | 1.22x10 <sup>-3</sup> | 1.02x10 <sup>-3</sup> | 8.24x10 <sup>-4</sup> | 1.09x10 <sup>-3</sup> | 0.000                 | 0.000                 |
| FANCL   | 3.93x10 <sup>-4</sup> | 7.44x10 <sup>-4</sup> | 7.96x10 <sup>-4</sup> | 4.06x10 <sup>-5</sup> | 6.60x10 <sup>-4</sup> | 6.91x10 <sup>-4</sup> | 1.03x10 <sup>-3</sup> | 1.03x10 <sup>-3</sup> |
| FANCF   | 0.000                 | 0.000                 | 0.000                 | 0.000                 | 0.000                 | 0.000                 | 0.000                 | 0.000                 |

|               |                       |                       |                       |                       |                       |                       |                       |
|---------------|-----------------------|-----------------------|-----------------------|-----------------------|-----------------------|-----------------------|-----------------------|
| <i>MECOM</i>  | 0.000                 | 1.24x10 <sup>-4</sup> | 5.31x10 <sup>-5</sup> | 4.06x10 <sup>-5</sup> | 0.000                 | 2.96x10 <sup>-4</sup> | 0.000                 |
| <i>PAX5</i>   | 0.000                 | 1.24x10 <sup>-4</sup> | 5.31x10 <sup>-5</sup> | 8.12x10 <sup>-5</sup> | 5.15x10 <sup>-5</sup> | 0.000                 | 0.000                 |
| <i>ETV6</i>   | 3.93x10 <sup>-4</sup> | 0                     | 5.31x10 <sup>-5</sup> | 4.06x10 <sup>-5</sup> | 1.03x10 <sup>-4</sup> | 0.000                 | 5.17x10 <sup>-4</sup> |
| <i>GATA2</i>  | 0.000                 | 0.000                 | 0.000                 | 0.000                 | 5.15x10 <sup>-5</sup> | 0.000                 | 0.000                 |
| <i>FLI1</i>   | 0.000                 | 0.000                 | 0.000                 | 4.06x10 <sup>-5</sup> | 0.000                 | 9.87x10 <sup>-5</sup> | 0.000                 |
| <i>SRP72</i>  | 0.000                 | 1.24x10 <sup>-4</sup> | 2.65x10 <sup>-4</sup> | 1.62x10 <sup>-4</sup> | 3.09x10 <sup>-4</sup> | 1.97x10 <sup>-4</sup> | 0.000                 |
| <i>HOXA11</i> | 0.000                 | 0.000                 | 0.000                 | 0.000                 | 0.000                 | 0.000                 | 0.000                 |
| <i>RUNX1</i>  | 0.000                 | 0.000                 | 2.65x10 <sup>-4</sup> | 4.06x10 <sup>-5</sup> | 5.15x10 <sup>-5</sup> | 0.000                 | 0.000                 |
| <i>CBL</i>    | 0.000                 | 7.44x10 <sup>-4</sup> | 3.18x10 <sup>-4</sup> | 3.65x10 <sup>-4</sup> | 3.09x10 <sup>-4</sup> | 2.96x10 <sup>-4</sup> | 0.000                 |
| <i>DDX41</i>  | 1.57x10 <sup>-3</sup> | 2.48x10 <sup>-4</sup> | 4.25x10 <sup>-4</sup> | 9.34x10 <sup>-4</sup> | 1.13x10 <sup>-3</sup> | 7.90x10 <sup>-4</sup> | 1.03x10 <sup>-3</sup> |
| <i>GFI1B</i>  | 3.92x10 <sup>-4</sup> | 2.48x10 <sup>-4</sup> | 2.12x10 <sup>-4</sup> | 3.65x10 <sup>-4</sup> | 3.61x10 <sup>-4</sup> | 2.96x10 <sup>-4</sup> | 5.17x10 <sup>-4</sup> |
| <i>CEBPA</i>  | 0.000                 | 0.000                 | 0.000                 | 0.000                 | 0.000                 | 0.000                 | 0.000                 |
| <i>GATA1</i>  | 0.000                 | 0.000                 | 0.000                 | 0.000                 | 0.000                 | 0.000                 | 0.000                 |
| <i>AK2</i>    | 3.92x10 <sup>-4</sup> | 2.48x10 <sup>-4</sup> | 1.59x10 <sup>-4</sup> | 2.03x10 <sup>-4</sup> | 1.03x10 <sup>-4</sup> | 0.000                 | 0.000                 |

Supplemental Table S6: Frequency Accumulation of pLOF Variants in IBMF Genes By Age

| Gene          | Frequency >80<br>(n=1935) | Frequency >70<br>(n=12,062) | Frequency>60<br>(n=31,478) | Frequency>50<br>(n=56,104) | Frequency >40<br>(n=74,946) | Frequency >30<br>(n=83,015) | Frequency All<br>(n=85,562) |
|---------------|---------------------------|-----------------------------|----------------------------|----------------------------|-----------------------------|-----------------------------|-----------------------------|
| <i>MDM4</i>   | 0.000                     | 0.000                       | 0.000                      | 0.000                      | 0.000                       | 0.000                       | 0.000                       |
| <i>TERT</i>   | 0.000                     | 1.97x10 <sup>-04</sup>      | 4.55x10 <sup>-04</sup>     | 6.17x10 <sup>-04</sup>     | 8.29x10 <sup>-04</sup>      | 1.20x10 <sup>-03</sup>      | 1.59x10 <sup>-03</sup>      |
| <i>NAF1</i>   | 0.000                     | 1.97x10 <sup>-04</sup>      | 3.00x10 <sup>-04</sup>     | 3.41x10 <sup>-04</sup>     | 3.94x10 <sup>-04</sup>      | 3.94x10 <sup>-04</sup>      | 3.94x10 <sup>-04</sup>      |
| <i>ZCCHC8</i> | 0.000                     | 0.000                       | 1.03x10 <sup>-04</sup>     | 1.03x10 <sup>-04</sup>     | 1.56x10 <sup>-04</sup>      | 2.80x10 <sup>-04</sup>      | 6.73x10 <sup>-04</sup>      |
| <i>POT1</i>   | 5.17x10 <sup>-04</sup>    | 6.16x10 <sup>-04</sup>      | 8.73x10 <sup>-04</sup>     | 9.95x10 <sup>-04</sup>     | 1.37x10 <sup>-03</sup>      | 1.86x10 <sup>-03</sup>      | 2.25x10 <sup>-03</sup>      |
| <i>RTEL1</i>  | 1.03x10 <sup>-03</sup>    | 1.72x10 <sup>-03</sup>      | 2.19x10 <sup>-03</sup>     | 3.04x10 <sup>-03</sup>     | 3.62x10 <sup>-03</sup>      | 4.24x10 <sup>-03</sup>      | 4.64x10 <sup>-03</sup>      |
| <i>PARN</i>   | 0.000                     | 9.87x10 <sup>-05</sup>      | 2.02x10 <sup>-04</sup>     | 4.05x10 <sup>-04</sup>     | 5.11x10 <sup>-04</sup>      | 1.50x10 <sup>-03</sup>      | 1.50x10 <sup>-03</sup>      |
| <i>TINF2</i>  | 0.000                     | 1.97x10 <sup>-04</sup>      | 1.97x10 <sup>-04</sup>     | 3.19x10 <sup>-04</sup>     | 4.25x10 <sup>-04</sup>      | 5.49x10 <sup>-04</sup>      | 9.42x10 <sup>-04</sup>      |
| <i>ACD</i>    | 1.03x10 <sup>-03</sup>    | 1.52x10 <sup>-03</sup>      | 1.83x10 <sup>-03</sup>     | 2.04x10 <sup>-03</sup>     | 2.30x10 <sup>-03</sup>      | 3.05x10 <sup>-03</sup>      | 3.05x10 <sup>-03</sup>      |
| <i>DKC1</i>   | 0.000                     | 0.000                       | 0.000                      | 0.000                      | 0.000                       | 0.000                       | 0.000                       |
| <i>NOP10</i>  | 5.17x10 <sup>-04</sup>    | 5.17x10 <sup>-04</sup>      | 5.17x10 <sup>-04</sup>     | 5.58x10 <sup>-04</sup>     | 5.58x10 <sup>-04</sup>      | 5.58x10 <sup>-04</sup>      | 5.58x10 <sup>-04</sup>      |
| <i>WRAP53</i> | 5.17x10 <sup>-04</sup>    | 9.12x10 <sup>-04</sup>      | 1.07x10 <sup>-03</sup>     | 1.35x10 <sup>-03</sup>     | 1.99x10 <sup>-03</sup>      | 2.61x10 <sup>-03</sup>      | 2.61x10 <sup>-03</sup>      |
| <i>CTC1</i>   | 1.55x10 <sup>-03</sup>    | 4.31x10 <sup>-03</sup>      | 7.30x10 <sup>-03</sup>     | 1.01x10 <sup>-02</sup>     | 1.31x10 <sup>-02</sup>      | 1.31x10 <sup>-02</sup>      | 1.74x10 <sup>-02</sup>      |
| <i>STN1</i>   | 5.17x10 <sup>-04</sup>    | 8.13x10 <sup>-04</sup>      | 1.12x10 <sup>-03</sup>     | 1.53x10 <sup>-03</sup>     | 1.95x10 <sup>-03</sup>      | 2.32x10 <sup>-03</sup>      | 2.32x10 <sup>-03</sup>      |
| <i>NHP2</i>   | 1.03x10 <sup>-03</sup>    | 1.52x10 <sup>-03</sup>      | 1.94x10 <sup>-03</sup>     | 2.34x10 <sup>-03</sup>     | 2.66x10 <sup>-03</sup>      | 2.91x10 <sup>-03</sup>      | 2.91x10 <sup>-03</sup>      |
| <i>SRP54</i>  | 0.000                     | 0.000                       | 0.000                      | 8.12x10 <sup>-05</sup>     | 1.34x10 <sup>-04</sup>      | 1.34x10 <sup>-04</sup>      | 5.27x10 <sup>-04</sup>      |
| <i>GFI1</i>   | 0.000                     | 0.000                       | 2.06x10 <sup>-04</sup>     | 2.47x10 <sup>-04</sup>     | 4.06x10 <sup>-04</sup>      | 4.06x10 <sup>-04</sup>      | 4.06x10 <sup>-04</sup>      |
| <i>WAS</i>    | 0.000                     | 0.000                       | 0.000                      | 0.000                      | 0.000                       | 0.000                       | 0.000                       |
| <i>TAZ</i>    | 0.000                     | 0.000                       | 0.000                      | 0.000                      | 0.000                       | 0.000                       | 0.000                       |
| <i>WIPF1</i>  | 0.000                     | 0.000                       | 0.000                      | 8.12x10 <sup>-05</sup>     | 8.12x10 <sup>-05</sup>      | 2.05x10 <sup>-04</sup>      | 2.05x10 <sup>-04</sup>      |
| <i>LYST</i>   | 5.17x10 <sup>-04</sup>    | 8.13x10 <sup>-04</sup>      | 1.43x10 <sup>-03</sup>     | 2.20x10 <sup>-03</sup>     | 2.89x10 <sup>-03</sup>      | 3.51x10 <sup>-03</sup>      | 4.69x10 <sup>-03</sup>      |
| <i>VPS45</i>  | 0.000                     | 3.95x10 <sup>-04</sup>      | 9.62x10 <sup>-04</sup>     | 1.33x10 <sup>-03</sup>     | 1.75x10 <sup>-03</sup>      | 2.00x10 <sup>-03</sup>      | 2.79x10 <sup>-03</sup>      |

|                |                        |                        |                        |                        |                        |                        |                        |
|----------------|------------------------|------------------------|------------------------|------------------------|------------------------|------------------------|------------------------|
| <i>VPS13B</i>  | 1.03x10 <sup>-03</sup> | 4.19x10 <sup>-03</sup> | 8.05x10 <sup>-03</sup> | 1.12x10 <sup>-02</sup> | 1.47x10 <sup>-02</sup> | 1.73x10 <sup>-02</sup> | 1.96x10 <sup>-02</sup> |
| <i>DNAJC21</i> | 1.03x10 <sup>-03</sup> | 2.51x10 <sup>-03</sup> | 3.91x10 <sup>-03</sup> | 4.92x10 <sup>-03</sup> | 6.25x10 <sup>-03</sup> | 8.35x10 <sup>-03</sup> | 9.92x10 <sup>-03</sup> |
| <i>CSF3R</i>   | 1.03x10 <sup>-03</sup> | 1.92x10 <sup>-03</sup> | 2.69x10 <sup>-03</sup> | 3.50x10 <sup>-03</sup> | 4.51x10 <sup>-03</sup> | 5.13x10 <sup>-03</sup> | 5.92x10 <sup>-03</sup> |
| <i>LAMTOR2</i> | 0.000                  | 9.87x10 <sup>-05</sup> | 1.50x10 <sup>-04</sup> | 1.50x10 <sup>-04</sup> | 2.03x10 <sup>-04</sup> | 2.03x10 <sup>-04</sup> | 2.03x10 <sup>-04</sup> |
| <i>USB1</i>    | 5.17x10 <sup>-04</sup> | 7.14x10 <sup>-04</sup> | 9.71x10 <sup>-04</sup> | 1.26x10 <sup>-03</sup> | 1.31x10 <sup>-03</sup> | 2.05x10 <sup>-03</sup> | 2.05x10 <sup>-03</sup> |
| <i>G6PC3</i>   | 5.17x10 <sup>-04</sup> | 1.21x10 <sup>-03</sup> | 1.78x10 <sup>-03</sup> | 2.30x10 <sup>-03</sup> | 3.15x10 <sup>-03</sup> | 3.40x10 <sup>-03</sup> | 4.19x10 <sup>-03</sup> |
| <i>SBDS</i>    | 6.72x10 <sup>-03</sup> | 1.46x10 <sup>-02</sup> | 2.31x10 <sup>-02</sup> | 3.15x10 <sup>-02</sup> | 3.94x10 <sup>-02</sup> | 4.79x10 <sup>-02</sup> | 5.49x10 <sup>-02</sup> |
| <i>HAX1</i>    | 5.17x10 <sup>-04</sup> | 2.40x10 <sup>-03</sup> | 3.64x10 <sup>-03</sup> | 4.25x10 <sup>-03</sup> | 4.88x10 <sup>-03</sup> | 5.75x10 <sup>-03</sup> | 7.32x10 <sup>-03</sup> |
| <i>RAB27A</i>  | 1.03x10 <sup>-03</sup> | 1.62x10 <sup>-03</sup> | 1.93x10 <sup>-03</sup> | 2.30x10 <sup>-03</sup> | 2.93x10 <sup>-03</sup> | 3.55x10 <sup>-03</sup> | 3.55x10 <sup>-03</sup> |

|               |       |                        |                        |                        |                        |                        |                        |
|---------------|-------|------------------------|------------------------|------------------------|------------------------|------------------------|------------------------|
| <i>KIF23</i>  | 0.000 | 1.97x10 <sup>-04</sup> | 2.49x10 <sup>-04</sup> | 2.49x10 <sup>-04</sup> | 3.02x10 <sup>-04</sup> | 4.26x10 <sup>-04</sup> | 4.26x10 <sup>-04</sup> |
| <i>RPL5</i>   | 0.000 | 0.000                  | 0.000                  | 0.000                  | 0.000                  | 0.000                  | 0.000                  |
| <i>SLC2A1</i> | 0.000 | 0.000                  | 0.000                  | 4.06x10 <sup>-05</sup> | 4.06x10 <sup>-05</sup> | 4.06x10 <sup>-05</sup> | 4.06x10 <sup>-05</sup> |
| <i>RPL19</i>  | 0.000 | 0.000                  | 0.000                  | 0.000                  | 0.000                  | 0.000                  | 0.000                  |
| <i>RPL15</i>  | 0.000 | 0.000                  | 0.000                  | 0.000                  | 0.000                  | 0.000                  | 0.000                  |
| <i>RPL18</i>  | 0.000 | 0.000                  | 0.000                  | 0.000                  | 0.000                  | 0.000                  | 0.000                  |
| <i>RPS7</i>   | 0.000 | 0.000                  | 0.000                  | 0.000                  | 0.000                  | 0.000                  | 0.000                  |
| <i>RPS10</i>  | 0.000 | 0.000                  | 0.000                  | 0.000                  | 0.000                  | 0.000                  | 0.000                  |
| <i>RPL11</i>  | 0.000 | 0.000                  | 0.000                  | 0.000                  | 0.000                  | 0.000                  | 0.000                  |
| <i>RPS19</i>  | 0.000 | 0.000                  | 0.000                  | 0.000                  | 0.000                  | 0.000                  | 0.000                  |
| <i>RPL26</i>  | 0.000 | 0.000                  | 5.15x10 <sup>-05</sup> |
| <i>RPL35A</i> | 0.000 | 0.000                  | 0.000                  | 0.000                  | 0.000                  | 0.000                  | 0.000                  |
| <i>RPL27</i>  | 0.000 | 0.000                  | 0.000                  | 4.06x10 <sup>-05</sup> | 4.06x10 <sup>-05</sup> | 4.06x10 <sup>-05</sup> | 4.06x10 <sup>-05</sup> |
| <i>RPS26</i>  | 0.000 | 0.000                  | 0.000                  | 0.000                  | 0.000                  | 0.000                  | 0.000                  |
| <i>RPS27</i>  | 0.000 | 0.000                  | 0.000                  | 0.000                  | 0.000                  | 0.000                  | 0.000                  |
| <i>RPL31</i>  | 0.000 | 9.87x10 <sup>-05</sup> |
| <i>RPL35</i>  | 0.000 | 9.87x10 <sup>-05</sup> |
| <i>RPS15A</i> | 0.000 | 0.000                  | 0.000                  | 0.000                  | 0.000                  | 0.000                  | 0.000                  |
| <i>RPS24</i>  | 0.000 | 0.000                  | 5.15x10 <sup>-05</sup> |

|                 |                        |                        |                        |                        |                        |                        |                        |
|-----------------|------------------------|------------------------|------------------------|------------------------|------------------------|------------------------|------------------------|
| <i>RPS29</i>    | 0.000                  | 0.000                  | 0.000                  | 0.000                  | 0.000                  | 0.000                  | 0.000                  |
| <i>RPS28</i>    | 0.000                  | 0.000                  | 0.000                  | 0.000                  | 0.000                  | 0.000                  | 0.000                  |
| <i>KLF1</i>     | 0.000                  | 1.97x10 <sup>-04</sup> | 2.49x10 <sup>-04</sup> | 4.52x10 <sup>-04</sup> | 7.17x10 <sup>-04</sup> | 8.41x10 <sup>-04</sup> | 8.41x10 <sup>-04</sup> |
| <i>RPS17</i>    | 0.000                  | 0.000                  | 0.000                  | 0.000                  | 0.000                  | 0.000                  | 0.000                  |
| <i>ALAS2</i>    | 0.000                  | 0.000                  | 0.000                  | 0.000                  | 0.000                  | 0.000                  | 0.000                  |
| <i>TSR2</i>     | 0.000                  | 0.000                  | 0.000                  | 0.000                  | 0.000                  | 0.000                  | 0.000                  |
| <i>GLRX5</i>    | 0.000                  | 0.000                  | 0.000                  | 0.000                  | 0.000                  | 0.000                  | 0.000                  |
| <i>CDAN1</i>    | 5.17x10 <sup>-04</sup> | 1.70x10 <sup>-03</sup> | 2.06x10 <sup>-03</sup> | 3.08x10 <sup>-03</sup> | 3.98x10 <sup>-03</sup> | 4.48x10 <sup>-03</sup> | 5.66x10 <sup>-03</sup> |
| <i>SEC23B</i>   | 2.07x10 <sup>-03</sup> | 2.96x10 <sup>-03</sup> | 4.71x10 <sup>-03</sup> | 6.13x10 <sup>-03</sup> | 7.56x10 <sup>-03</sup> | 9.05x10 <sup>-03</sup> | 1.02x10 <sup>-02</sup> |
| <i>CECR1</i>    | 5.17x10 <sup>-04</sup> | 1.41x10 <sup>-03</sup> | 2.23x10 <sup>-03</sup> | 2.64x10 <sup>-03</sup> | 3.22x10 <sup>-03</sup> | 4.09x10 <sup>-03</sup> | 4.87x10 <sup>-03</sup> |
| <i>SLC25A38</i> | 0.000                  | 1.09x10 <sup>-03</sup> | 1.71x10 <sup>-03</sup> | 2.40x10 <sup>-03</sup> | 2.88x10 <sup>-03</sup> | 3.62x10 <sup>-03</sup> | 3.62x10 <sup>-03</sup> |

|                |                        |                        |                        |                        |                        |                        |                        |
|----------------|------------------------|------------------------|------------------------|------------------------|------------------------|------------------------|------------------------|
| <i>RAD51</i>   | 0.000                  | 0.000                  | 5.15x10 <sup>-05</sup> | 5.15x10 <sup>-05</sup> | 1.58x10 <sup>-04</sup> | 1.58x10 <sup>-04</sup> | 5.51x10 <sup>-04</sup> |
| <i>FANCB</i>   | 0.000                  | 0.000                  | 0.000                  | 0.000                  | 0.000                  | 0.000                  | 0.000                  |
| <i>NHEJ1</i>   | 0.000                  | 0.000                  | 0.000                  | 4.06x10 <sup>-05</sup> | 1.47x10 <sup>-04</sup> | 5.19x10 <sup>-04</sup> | 5.19x10 <sup>-04</sup> |
| <i>FANCM</i>   | 2.58x10 <sup>-03</sup> | 5.74x10 <sup>-03</sup> | 8.73x10 <sup>-03</sup> | 1.24x10 <sup>-02</sup> | 1.53x10 <sup>-02</sup> | 1.80x10 <sup>-02</sup> | 2.23x10 <sup>-02</sup> |
| <i>BRCA2</i>   | 0.000                  | 8.89x10 <sup>-04</sup> | 1.30x10 <sup>-03</sup> | 2.11x10 <sup>-03</sup> | 2.96x10 <sup>-03</sup> | 3.71x10 <sup>-03</sup> | 4.49x10 <sup>-03</sup> |
| <i>ATM</i>     | 2.58x10 <sup>-03</sup> | 4.65x10 <sup>-03</sup> | 7.53x10 <sup>-03</sup> | 1.01x10 <sup>-02</sup> | 1.27x10 <sup>-02</sup> | 1.55x10 <sup>-02</sup> | 1.87x10 <sup>-02</sup> |
| <i>ERCC6L2</i> | 5.17x10 <sup>-04</sup> | 1.60x10 <sup>-03</sup> | 2.68x10 <sup>-03</sup> | 3.82x10 <sup>-03</sup> | 5.04x10 <sup>-03</sup> | 7.15x10 <sup>-03</sup> | 1.11x10 <sup>-02</sup> |
| <i>FANCD2</i>  | 1.03x10 <sup>-03</sup> | 2.91x10 <sup>-03</sup> | 4.35x10 <sup>-03</sup> | 5.65x10 <sup>-03</sup> | 7.24x10 <sup>-03</sup> | 8.48x10 <sup>-03</sup> | 9.66x10 <sup>-03</sup> |
| <i>FANCE</i>   | 0.000                  | 1.97x10 <sup>-04</sup> | 7.64x10 <sup>-04</sup> | 1.29x10 <sup>-03</sup> | 1.77x10 <sup>-03</sup> | 2.64x10 <sup>-03</sup> | 3.82x10 <sup>-03</sup> |
| <i>SLX4</i>    | 1.03x10 <sup>-03</sup> | 1.82x10 <sup>-03</sup> | 3.42x10 <sup>-03</sup> | 4.84x10 <sup>-03</sup> | 6.33x10 <sup>-03</sup> | 7.57x10 <sup>-03</sup> | 7.96x10 <sup>-03</sup> |
| <i>LIG4</i>    | 1.03x10 <sup>-03</sup> | 3.10x10 <sup>-03</sup> | 4.34x10 <sup>-03</sup> | 5.72x10 <sup>-03</sup> | 6.78x10 <sup>-03</sup> | 8.14x10 <sup>-03</sup> | 1.05x10 <sup>-02</sup> |
| <i>ESCO2</i>   | 0.000                  | 0.000                  | 1.55x10 <sup>-04</sup> | 2.77x10 <sup>-04</sup> | 5.95x10 <sup>-04</sup> | 5.95x10 <sup>-04</sup> | 5.95x10 <sup>-04</sup> |
| <i>ERCC4</i>   | 1.55x10 <sup>-03</sup> | 2.93x10 <sup>-03</sup> | 3.55x10 <sup>-03</sup> | 4.24x10 <sup>-03</sup> | 5.19x10 <sup>-03</sup> | 6.18x10 <sup>-03</sup> | 6.58x10 <sup>-03</sup> |
| <i>FANCC</i>   | 1.03x10 <sup>-03</sup> | 1.62x10 <sup>-03</sup> | 2.19x10 <sup>-03</sup> | 2.84x10 <sup>-03</sup> | 3.74x10 <sup>-03</sup> | 5.35x10 <sup>-03</sup> | 6.14x10 <sup>-03</sup> |
| <i>FANCI</i>   | 5.17x10 <sup>-04</sup> | 3.09x10 <sup>-03</sup> | 5.05x10 <sup>-03</sup> | 6.80x10 <sup>-03</sup> | 8.82x10 <sup>-03</sup> | 1.18x10 <sup>-02</sup> | 1.34x10 <sup>-02</sup> |
| <i>NBN</i>     | 5.17x10 <sup>-04</sup> | 1.21x10 <sup>-03</sup> | 2.03x10 <sup>-03</sup> | 2.89x10 <sup>-03</sup> | 3.63x10 <sup>-03</sup> | 4.62x10 <sup>-03</sup> | 5.80x10 <sup>-03</sup> |
| <i>DDX11</i>   | 3.62x10 <sup>-03</sup> | 5.50x10 <sup>-03</sup> | 7.46x10 <sup>-03</sup> | 9.00x10 <sup>-03</sup> | 1.04x10 <sup>-02</sup> | 1.16x10 <sup>-02</sup> | 1.67x10 <sup>-02</sup> |

|               |                        |                        |                        |                        |                        |                        |                        |
|---------------|------------------------|------------------------|------------------------|------------------------|------------------------|------------------------|------------------------|
| <i>PALB2</i>  | 0.000                  | 3.95x10 <sup>-04</sup> | 7.56x10 <sup>-04</sup> | 1.04x10 <sup>-03</sup> | 1.41x10 <sup>-03</sup> | 1.66x10 <sup>-03</sup> | 1.66x10 <sup>-03</sup> |
| <i>BRCA1</i>  | 2.07x10 <sup>-03</sup> | 3.16x10 <sup>-03</sup> | 4.19x10 <sup>-03</sup> | 4.88x10 <sup>-03</sup> | 6.15x10 <sup>-03</sup> | 7.14x10 <sup>-03</sup> | 7.93x10 <sup>-03</sup> |
| <i>FANCG</i>  | 1.03x10 <sup>-03</sup> | 1.43x10 <sup>-03</sup> | 2.30x10 <sup>-03</sup> | 3.11x10 <sup>-03</sup> | 4.07x10 <sup>-03</sup> | 5.06x10 <sup>-03</sup> | 6.63x10 <sup>-03</sup> |
| <i>FANCA</i>  | 3.10x10 <sup>-03</sup> | 6.26x10 <sup>-03</sup> | 8.01x10 <sup>-03</sup> | 1.02x10 <sup>-02</sup> | 1.32x10 <sup>-02</sup> | 1.56x10 <sup>-02</sup> | 1.67x10 <sup>-02</sup> |
| <i>RAD51C</i> | 0.000                  | 1.09x10 <sup>-03</sup> | 1.91x10 <sup>-03</sup> | 2.93x10 <sup>-03</sup> | 4.15x10 <sup>-03</sup> | 4.90x10 <sup>-03</sup> | 6.47x10 <sup>-03</sup> |
| <i>FANCL</i>  | 1.03x10 <sup>-03</sup> | 1.72x10 <sup>-03</sup> | 2.38x10 <sup>-03</sup> | 2.42x10 <sup>-03</sup> | 3.22x10 <sup>-03</sup> | 3.96x10 <sup>-03</sup> | 4.35x10 <sup>-03</sup> |
| <i>FANCF</i>  | 0.000                  | 0.000                  | 0.000                  | 0.000                  | 0.000                  | 0.000                  | 0.000                  |

|               |                        |                        |                        |                        |                        |                        |                        |
|---------------|------------------------|------------------------|------------------------|------------------------|------------------------|------------------------|------------------------|
| <i>MECOM</i>  | 0.000                  | 2.96x10 <sup>-04</sup> | 2.96x10 <sup>-04</sup> | 3.37x10 <sup>-04</sup> | 3.90x10 <sup>-04</sup> | 5.14x10 <sup>-04</sup> | 5.14x10 <sup>-04</sup> |
| <i>PAX5</i>   | 0.000                  | 0.000                  | 5.15x10 <sup>-05</sup> | 1.33x10 <sup>-04</sup> | 1.86x10 <sup>-04</sup> | 3.10x10 <sup>-04</sup> | 3.10x10 <sup>-04</sup> |
| <i>ETV6</i>   | 5.17x10 <sup>-04</sup> | 5.17x10 <sup>-04</sup> | 6.20x10 <sup>-04</sup> | 6.60x10 <sup>-04</sup> | 7.13x10 <sup>-04</sup> | 7.13x10 <sup>-04</sup> | 1.11x10 <sup>-03</sup> |
| <i>GATA2</i>  | 0.000                  | 0.000                  | 5.15x10 <sup>-05</sup> |
| <i>FLI1</i>   | 0.000                  | 9.87x10 <sup>-05</sup> | 9.87x10 <sup>-05</sup> | 1.39x10 <sup>-04</sup> | 1.39x10 <sup>-04</sup> | 1.39x10 <sup>-04</sup> | 1.39x10 <sup>-04</sup> |
| <i>SRP72</i>  | 0.000                  | 1.97x10 <sup>-04</sup> | 5.07x10 <sup>-04</sup> | 6.69x10 <sup>-04</sup> | 9.34x10 <sup>-04</sup> | 1.06x10 <sup>-03</sup> | 1.06x10 <sup>-03</sup> |
| <i>HOXA11</i> | 0.000                  | 0.000                  | 0.000                  | 0.000                  | 0.000                  | 0.000                  | 0.000                  |
| <i>RUNX1</i>  | 0.000                  | 0.000                  | 5.15x10 <sup>-05</sup> | 9.21x10 <sup>-05</sup> | 3.57x10 <sup>-04</sup> | 3.57x10 <sup>-04</sup> | 3.57x10 <sup>-04</sup> |
| <i>CBL</i>    | 0.000                  | 2.96x10 <sup>-04</sup> | 6.05x10 <sup>-04</sup> | 9.70x10 <sup>-04</sup> | 1.29x10 <sup>-03</sup> | 2.03x10 <sup>-03</sup> | 2.03x10 <sup>-03</sup> |
| <i>DDX41</i>  | 1.03x10 <sup>-03</sup> | 1.82x10 <sup>-03</sup> | 2.95x10 <sup>-03</sup> | 3.88x10 <sup>-03</sup> | 4.31x10 <sup>-03</sup> | 4.56x10 <sup>-03</sup> | 6.13x10 <sup>-03</sup> |
| <i>GFI1B</i>  | 5.17x10 <sup>-04</sup> | 8.13x10 <sup>-04</sup> | 1.17x10 <sup>-03</sup> | 1.54x10 <sup>-03</sup> | 1.75x10 <sup>-03</sup> | 2.00x10 <sup>-03</sup> | 2.39x10 <sup>-03</sup> |
| <i>CEBPA</i>  | 0.000                  | 0.000                  | 0.000                  | 0.000                  | 0.000                  | 0.000                  | 0.000                  |
| <i>GATA1</i>  | 0.000                  | 0.000                  | 0.000                  | 0.000                  | 0.000                  | 0.000                  | 0.000                  |
| <i>AK2</i>    | 0.000                  | 0.000                  | 1.03x10 <sup>-04</sup> | 3.06x10 <sup>-04</sup> | 4.65x10 <sup>-04</sup> | 7.13x10 <sup>-04</sup> | 1.11x10 <sup>-03</sup> |



## Supplemental Table S7 Loss-of-function Variants in DBA Genes in gnomAD

| Gene  | Chr | Position | rsID         | Reference | Alternate                                                                                     | Protein Consequence | Transcript Consequence                                                                           | Annotation              | Exon | Age   | Allele Count | Allele Number | Allele Frequency |
|-------|-----|----------|--------------|-----------|-----------------------------------------------------------------------------------------------|---------------------|--------------------------------------------------------------------------------------------------|-------------------------|------|-------|--------------|---------------|------------------|
| RPS10 | 6   | 34389532 | rs1373580194 | ATC       | A                                                                                             | p.Asp125TyrfsTer28  | c.373_374delGA                                                                                   | frameshift_variant      | 4    | n/a   | 1            | 251176        | 3.98127E-06      |
| RPS10 | 6   | 34392618 | rs779387874  | CTG       | C                                                                                             |                     | c.151-3_151-2delCA                                                                               | splice_acceptor_variant | 3    | n/a   | 1            | 248752        | 4.02007E-06      |
| RPL26 | 17  | 8280963  | rs778804923  | G         | A                                                                                             | p.Arg115Ter         | c.342C>T                                                                                         | stop_gained             | 4    | 60-65 | 2            | 248858        | 8.03671E-06      |
| RPL26 | 17  | 8280968  | rs1325509343 | T         | TAACTCGCGCC<br>CGTTCCCATTC<br>CCACGTTGTTGC<br>CAAGTCTCCAG<br>C                                | p.Ile118AlafsTer39  | c.351_352insGCTG<br>GAGACTTGGCAA<br>CAACGTGGGAAT<br>GGGGAACGGGCG<br>CGAGTT                       | frameshift_variant      | 4    | 60-65 | 1            | 249288        | 4.01142E-06      |
| RPL26 | 17  | 8281022  | rs781337048  | T         | TAAGAAA<br>AAAACAC<br>TCCAAG<br>CTTTAAAT<br>AATCACT<br>AAAACAC<br>AAGGGAA<br>AGCCCAA<br>CATTC |                     | c.142-41_161delGAATGT<br>TGGGCTTCCCTT<br>GTGTTTATGATGAT<br>TATTTAAAGCTTG<br>GGAGTGTTTTTTT<br>CTT | splice_acceptor_variant | 4    | 30-35 | 1            | 238292        | 4.19653E-06      |
| RPL27 | 17  | 41154800 | rs746070243  | G         | GGTAAGTA                                                                                      |                     | c.362+2_362+8dupT<br>AAGTAG                                                                      | stop_gained             | 4    | 50-55 | 1            | 251482        | 3.97643E-06      |
| RPS24 | 10  | 79814287 | rs1228580232 | A         | T                                                                                             |                     | c.391-2A>T                                                                                       | splice_acceptor_variant | 4    | 55-60 | 1            | 143222        | 6.98217E-06      |
| RPS29 | 14  | 50044573 | rs1354511680 | T         | G                                                                                             |                     | c.163-2A>C                                                                                       | splice_acceptor_variant | 3    | n/a   | 1            | 204148        | 4.89841E-06      |

## Supplemental Table S8: Loss-of-function Variants in *SRP54* in gnomAD

| Gene  | Chr | Position | rsID         | Reference | Alternate | Protein Consequence | Transcript Consequence | Annotation           | Exon | Age   | Allele Count | Allele Number | Allele Frequency |
|-------|-----|----------|--------------|-----------|-----------|---------------------|------------------------|----------------------|------|-------|--------------|---------------|------------------|
| SRP54 | 14  | 35465938 | rs771241246  | G         | GA        | p.Ile10AsnfsTer16   | c.28dupA               | frameshift_variant   | 2    | 50-55 | 1            | 251354        | 3.97845E-06      |
| SRP54 | 14  | 35476529 | rs753087160  | GA        | G         | p.Lys100AsnfsTer4   | c.300delA              | frameshift_variant   | 5    | <30   | 1            | 248880        | 4.018E-06        |
| SRP54 | 14  | 35480732 | rs1357701182 | CT        | C         | p.Val169SerfsTer8   | c.504delT              | frameshift_variant   | 8    | n/a   | 1            | 238176        | 4.19858E-06      |
| SRP54 | 14  | 35482701 | rs1335654383 | G         | A         |                     | c.785+1G>A             | splice_donor_variant | 9    | 45-50 | 1            | 250940        | 3.98502E-06      |
| SRP54 | 14  | 35488185 | rs1408854882 | GT        | G         | p.Phe355LeufsTer6   | c.1065delT             | frameshift_variant   | 13   | n/a   | 1            | 31398         | 3.18492E-05      |
| SRP54 | 14  | 35488227 | rs767844326  | C         | A         | p.Ser368Ter         | c.1103C>A              | stop_gained          | 13   | 55-60 | 1            | 251214        | 3.98067E-06      |
